# Supplementary material
Source: PubMed Central journal article supplement (PMC2682595)

**Figure S1.** Bnr1p FH1-FH2-COOH rescues *bni1Δ bnr1Δ* lethality under stressful conditions. Equivalent dilutions of *bni1Δ bnr1Δ* cells expressing Bni1p, Bnr1p, or Bnr1p FH1-FH2-COOH were spotted on YPD and incubated for seven days at 14 °C, four days at 26 °C or two days at 37 °C, or spotted onto YPD+1M NaCl or 1.5M sorbitol and incubated at 26 °C for five days.

**Figure S2.** Cytokinesis is not compromised in cells expressing a delocalized formin and a headless myosin II. *bni1Δ BNRI, pGFP-MYO1*, or *bni1Δ BNRI, pGFP-MYO1T* and *bni1Δ BNRI FH1-FH2-COOH, pGFP-MYO1* or *bni1Δ BNRI FH1-FH2-COOH, pGFP-MYOT* cells were digested with zymolyase as described (Lippincott and Li, 1998a) and then counted as cells with one or two cell bodies (no cytokinesis defect) or cells with more than two cell bodies (cytokinesis defect).

**Figure S3.** *bni1Δ bnr1Δ* cells expressing Bnr1p FH1-FH2-COOH does not accumulate internal Bgl2p. External and internal proteins of *bni1Δ bnr1Δ* cells expressing either Bni1p, Bnr1p or Bnr1p FH1-FH2-COOH were subjected to western blotting with Bgl2p antiserum. The resulting intensity was normalized against Tpm1p levels.

**Video 1.** GFP-Sec4p particles in *bni1Δ bnr1Δ* cells expressing Bnr1p FH1-FH2-COOH. Cells were imaged at a rate of 5 frames per second for 15 seconds.

Figure S1

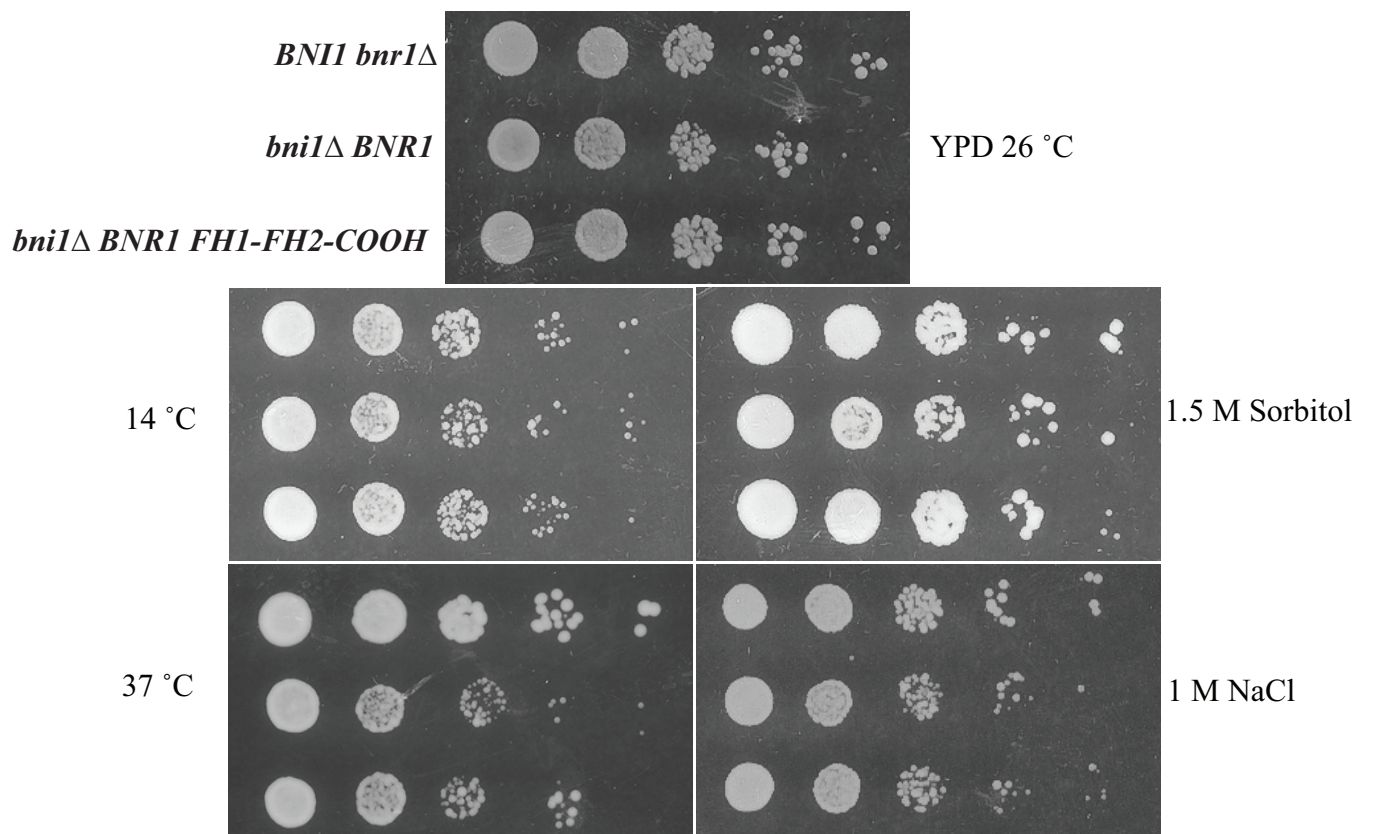

Figure S2

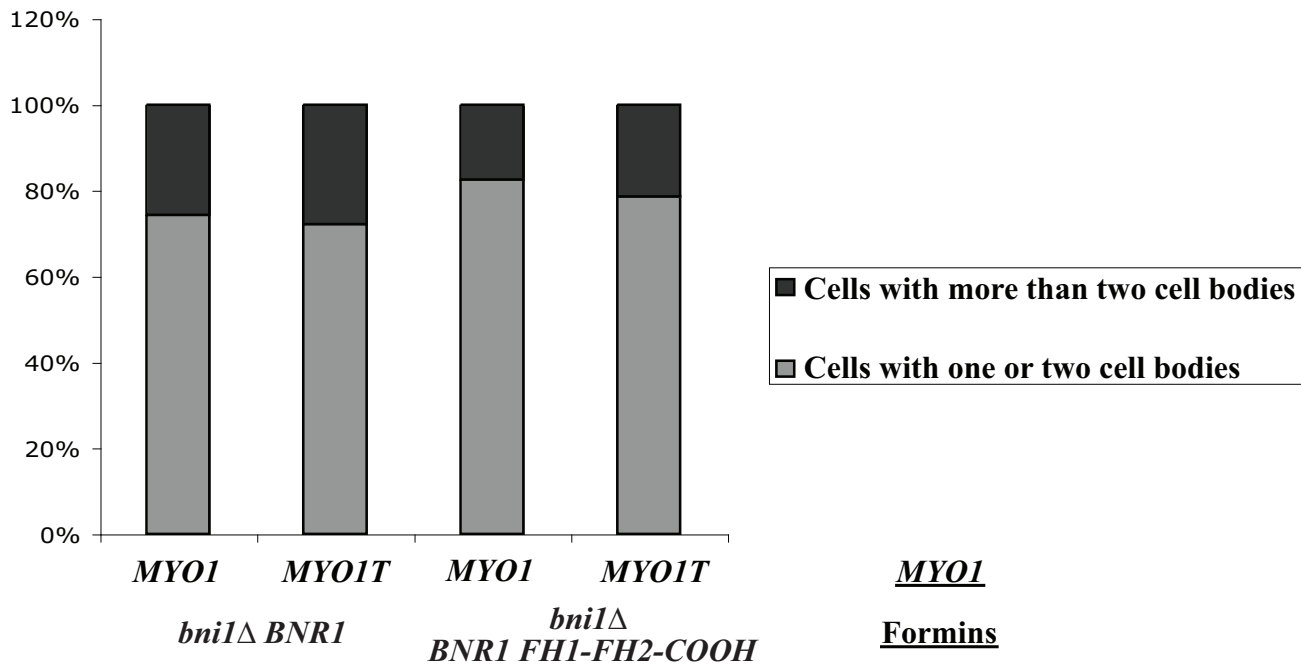

Figure S3

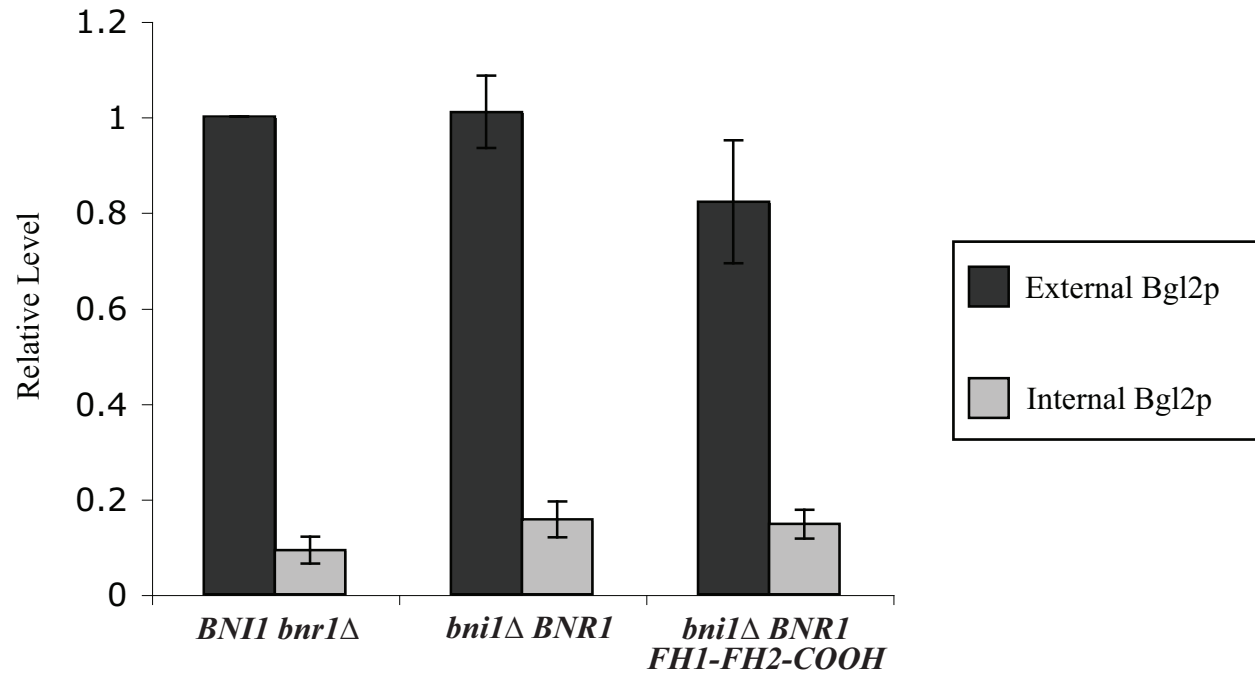

Supplement: E09-03-0194_1.pdf [file E09-03-0194_1.pdf]
